# Supplementary material for: Lunches in UK early years education and care settings: cross-sectional analysis of food processing, provision and intake
Source: Research Square preprint supplement (doi:10.21203/rs.3.rs-9452819/v1), 2026-04-23
Supplement: Supplementary file 1 [file 85fa100c854e0f6b8910d0fc.docx]

**Lunches in UK early years education and care settings: cross-sectional analysis of food processing, provision and intake**

**Supplementary methods**

Further details on Remote Food Photography Methods Used

Two research staff carried out the RFPM per child. One researcher took a photograph before and after each eating occasion at a 45-degree angle and ensuring all food/drink items were captured, alongside a reference card indicating date, eating occasion, child ID, before/after image and scalar. If a child received extra portions, additional before and after photos were taken. Participant-level data collection notes were taken by the second researcher to record type of food provision (ECEC provided or parent provided), a description of the food and additional notes, e.g. if food dropped on the floor, to support the coding process alongside the photos. Any available recipe or nutrient information was also collected during data collection. All photos were checked by the ECEC manager prior to data collection end to ensure no identifiable or inappropriate content was included in error. Photos and associated notes were processed and identified foods were matched to nutrient composition data using the National Diet and Nutrition Survey (NDNS) nutrient databank[[1]](#footnote-1). Portion size was quantified and combined with estimates of nutrient composition of all food items by the Pennington Biomedical Research Center team[[2]](#footnote-2).

Further information on methods used to collect child measurements

Weight and height were measured twice without shoes by trained researchers within the ECEC settings to the nearest 0.1 kg (Seca 875 Digital Flat Scale, Hamburg) and 0.1 cm (Portable stadiometer, Marsden HM-250P, Rotherham, UK), respectively.

Further details on mediation analyses

The total effect (c) was calculated by fitting the multivariable model with total kcal served as the dependent variable, lunch provision as the independent variable, and adjustment for all other potential confounders as fixed effects. To estimate the direct effect (c’) of lunch provision on serving size, separate mediation models were fitted for each of the food quality measures, which included the potential mediator alongside all potential confounders. Indirect paths (a and b) were estimated after fitting models with the mediator variable as the outcome and lunch provision as the main exposure variable (path a) and total kcal served as the outcome and the mediator variable as the main exposure variable (path b); models were adjusted for all other potential confounders as fixed effects. For each measure of food quality, the direct (c’) and indirect (c-c’) effects were calculated and the proportion of mediation is reported as the indirect effect size divided by the total effect size.

**Table 1:** England and Scotland ECECs: Proportion of kcal consumed from HFSS foods, UPFs and non-core foods summarised across different child characteristics; estimates from univariable models not provided, but * indicate characteristics that showed evidence of association with the outcome in univariable analyses.

|  | |  | Proportion of total kcal consumed from: | | | | | |
| --- | --- | --- | --- | --- | --- | --- | --- | --- |
|  | |  | HFSS foods | | UPFs | | Non-core foods | |
|  | | n/N (%) | Median | IQR | Median | IQR | Median | IQR |
| Overall | | 532 | 47.3a | (18.6, 70.7) | 61.6a | (34.1, 84.7) | 38.5a | (8.8, 61.4) |
| Age | |  |  |  |  |  |  |  |
|  | 24-35 months | 100/529 (18.9%) | 37.6* | (0.0, 54.7) | 51.0 | (22.2, 82.1) | 36.9 | (2.2, 54.4) |
|  | 36-47 months | 264/529 (49.9%) | 50.0b* | (22.9, 72.4) | 61.8b | (32.0, 83.3) | 40.1b | (11.3, 63.4) |
|  | 48+ months | 165/529 (31.2%) | 52.0c* | (30.6, 73.7) | 66.8c | (41.7, 87.8) | 37.3c | (8.7, 60.6) |
| Gender | |  |  |  |  |  |  |  |
|  | Male | 264/529 (49.9%) | 48.6b | (16.8, 74.1) | 60.5b | (23.2, 84.0) | 35.4b | (5.8, 63.4) |
|  | Female | 265/529 (50.1%) | 46.0c | (23.1, 67.7) | 64.7c | (39.9, 84.8) | 40.0c | (9.7, 60.2) |
| zBMI | |  |  |  |  |  |  |  |
|  | Healthy weight | 370/497 (74.4%) | 48.3c | (18.5, 71.1) | 61.4c | (33.8, 84.0) | 38.3c | (6.9, 60.4) |
|  | Unhealthy weight | 127/497 (25.6%) | 46.0b | (26.9, 70.6) | 68.1b | (42.7, 86.4) | 40.9b | (14.1, 68.7) |
| Child deprivation | |  |  |  |  |  |  |  |
|  | High | 190/532 (35.7%) | 44.8c* | (25.4, 73.1) | 64.8c | (34.1, 87.4) | 39.2c | (9.1, 69.9) |
|  | Moderate | 233/532 (43.8%) | 48.8b* | (21.3, 72.9) | 62.7b | (39.4, 85.6) | 38.7b | (12.5, 60.2) |
|  | Low | 109/532 (20.5%) | 42.9* | (12.7, 63.9) | 52.8 | (16.8, 74.1) | 35.5 | (0.0, 55.6) |
| Attached to school? | |  |  |  |  |  |  |  |
|  | Not attached | 355/532 (66.7%) | 44.9a | (15.4, 68.9) | 63.0a | (30.6, 84.8) | 36.4a | (6.4, 59.7) |
|  | Attached | 177/532 (33.3%) | 52.0 | (34.1, 75.9) | 59.9 | (40.0, 83.3) | 40.8 | (9.1, 65.9) |
| Local government area | |  |  |  |  |  |  |  |
|  | Somerset | 217/532 (40.8%) | 44.8c | (17.2, 67.8) | 63.0c | (33.9, 82.4) | 39.9c | (14.0, 63.0) |
|  | Swindon | 63/532 (11.8%) | 49.1c | (32.7, 69.1) | 61.1c | (26.9, 83.7) | 39.2c | (12.7, 59.7) |
|  | Sandwell | 79/532 (14.8%) | 56.8 | (27.4, 79.6) | 64.0 | (33.1, 91.9) | 38.5 | (15.3, 65.9) |
|  | Arran and Ayrshire | 173/532 (32.5%) | 45.5c | (7.6, 70.5) | 60.6c | (37.4, 86.5) | 32.1c | (0.0, 59.5) |
| Country | |  |  |  |  |  |  |  |
|  | England | 359/532 (67.5%) | 47.4b | (23.1, 71.0) | 61.8b | (33.7, 83.8) | 39.7b | (13.6, 61.9) |
|  | Scotland | 173/532 (32.5%) | 45.5c | (7.6, 70.5) | 60.6c | (37.4, 86.5) | 32.2c | (0.0, 59.6) |
| Season | |  |  |  |  |  |  |  |
|  | Winter/Spring | 174/532 (32.7%) | 49.5b | (16.0, 68.6) | 66.2b | (35.4, 84.1) | 38.2b | (4.6, 59.6) |
|  | Summer | 174/532 (32.7%) | 52.2 | (35.7, 74.5) | 61.7 | (37.7, 87.6) | 41.3 | (12.6, 64.3) |
|  | Autumn | 184/532 (34.6%) | 40.2c | (12.4, 68.7) | 59.2c | (30.8, 82.7) | 36.2c | (6.9, 61.1) |
| Lunch provision | |  |  |  |  |  |  |  |
|  | ECEC provided | 352/529 (66.5%) | 39.7b* | (0.0, 67.0) | 49.7b* | (21.2, 79.3) | 31.5b* | (0.0, 58.7) |
|  | Packed lunch | 177/529 (33.5%) | 60.6c* | (43.2, 75.6) | 73.8c* | (59.7, 87.8) | 49.3c* | (31.5, 64.8) |

Abbreviations: zBMI -standardised body mass index; ECEC - early childhood education and care; IQR – interquartile range; HFSS - high fat, salt or sugar; UPF – ultra-processed food.

a missing for 3 children; b missing for 2 children; c missing for 1 child

**Table 2:** England ECEC: kcal served, and proportion of kcal served from HFSS, UPF and non-core foods summarised across child characteristics; estimates from univariable models not provided, but * indicate characteristics that showed evidence of association with the outcome in univariable analyses.

|  | |  |  |  | Proportion of total kcal served from: | | | | | |
| --- | --- | --- | --- | --- | --- | --- | --- | --- | --- | --- |
| England | |  | Kcal served | | HFSS foods | | UPFs | | Non-core foods | |
|  | | N | Median | IQR | Median | IQR | Median | IQR | Median | IQR |
| Overall | | 359 | 466.1 | (362.9, 584.3) | 49.4 | (29.5, 66.9) | 60.0 | (31.3, 80.3) | 40.0 | (16.8, 58.6) |
| Age | |  |  |  |  |  |  |  |  |  |
|  | 24-35 months | 86/357 (24.1%) | 457.3 | (366.8, 544.9) | 40.4 | (12.8, 53.4) | 47.7 | (22.8, 75.3) | 30.2 | (7.0, 52.6) |
|  | 36-47 months | 172/357 (48.2%) | 469.3 | (366.4, 592.7) | 51.4 | (30.4, 67.6) | 61.8 | (33.0, 80.3) | 43.2 | (20.7, 59.4) |
|  | 48+ months | 99/357 (27.7%) | 465.2 | (360.3, 615.4) | 58.8 | (36.7, 74.1) | 63.9 | (44.4, 85.9) | 43.5 | (18.8, 60.7) |
| Gender | |  |  |  |  |  |  |  |  |  |
|  | Male | 175/358 (48.9%) | 466.8 | (362.8, 592.4) | 51.4 | (28.3, 69.1) | 59.0 | (27.5, 80.6) | 37.9 | (16.1, 57.8) |
|  | Female | 183/358 (51.1%) | 465.2 | (365.7, 579.0) | 47.6 | (31.3, 66.2) | 60.2 | (33.9, 80.2) | 42.5 | (18.9, 58.8) |
| zBMI | |  |  |  |  |  |  |  |  |  |
|  | Healthy weight | 254/336 (75.6%) | 463.5 | (358.8, 589.7) | 51.0 | (34.2, 68.2) | 61.7 | (33.8, 80.3) | 43.2 | (19.3, 59.5) |
|  | Unhealthy weight | 82/336 (24.4%) | 494.7 | (403.3, 583.8) | 46.9 | (29.0, 64.3) | 58.5 | (35.5, 80.3) | 35.8 | (16.8, 53.0) |
| Child deprivation | |  |  |  |  |  |  |  |  |  |
|  | High deprivation | 114/359 (31.8%) | 432.8 | (360.8, 539.1) | 52.5* | (35.9, 66.9) | 61.4* | (33.1, 86.4) | 39.7* | (16.9, 61.4) |
|  | Moderate deprivation | 166/359 (46.2%) | 485.0 | (381.7, 587.0) | 52.4* | (32.8, 69.4) | 62.4* | (33.9, 80.3) | 43.4* | (23.7, 57.7) |
|  | Low deprivation | 79/359 (22.0%) | 489.2 | (360.3, 639.3) | 39.6* | (9.7, 61.2) | 48.9* | (9.4, 72.0) | 32.5* | (0.0, 53.2) |
| Provider type | |  |  |  |  |  |  |  |  |  |
|  | Not attached to school | 255/359 (71.0%) | 465.2 | (360.7, 572.3) | 46.2* | (16.8, 66.1) | 58.2 | (23.2, 80.6) | 37.8 | (10.4, 57.5) |
|  | Attached to school | 104/359 (29.0%) | 472.9 | (378.5, 594.4) | 60.0* | (38.0, 75.0) | 61.7 | (39.6, 78.6) | 44.9 | (29.7, 60.4) |
| Local government area | |  |  |  |  |  |  |  |  |  |
|  | Somerset | 217/359 (60.4%) | 467.2 | (366.8, 602.8) | 47.3 | (28.8, 64.4) | 61.8 | (33.9, 79.9) | 42.5 | (18.9, 57.5) |
|  | Swindon | 63/359 (17.5%) | 497.7 | (404.0, 588.1) | 52.4 | (29.5, 68.2) | 58.0 | (26.9, 82.9) | 41.7 | (22.2, 60.2) |
|  | Sandwell | 79/359 (22.0%) | 433.7 | (307.7, 528.9) | 57.2 | (34.2, 69.8) | 53.1 | (29.4, 86.4) | 34.2 | (16.1, 59.3) |
| Season of data collection | |  |  |  |  |  |  |  |  |  |
|  | Winter/Spring | 126/359 (35.1%) | 469.0 | (374.6, 592.4) | 48.3 | (24.3, 67.1) | 61.7 | (35.5, 80.3) | 43.9 | (16.0, 61.3) |
|  | Summer | 137/359 (38.2%) | 466.1 | (360.3, 563.0) | 51.6 | (35.4, 69.3) | 60.7 | (33.9, 83.4) | 41.9 | (17.9, 57.5) |
|  | Autumn | 96/359 (26.7%) | 444.0 | (375.5, 580.6) | 44.8 | (30.6, 64.3) | 52.5 | (23.0, 75.6) | 37.5 | (25.1, 53.5) |
| Lunch provision | |  |  |  |  |  |  |  |  |  |
|  | ECEC provided | 184/356 (51.7%) | 418.9* | (332.4, 529.2) | 36.2* | (0.0, 52.4) | 36.9* | (11.8, 63.7) | 27.8* | (0.0, 46.9) |
|  | Packed lunch | 172/356 (48.3%) | 522.0* | (408.8, 671.6) | 62.1* | (47.3, 74.5) | 74.2* | (60.1, 87.5) | 51.0* | (34.9, 60.9) |

Abbreviations: zBMI -standardised body mass index; ECEC - early childhood education and care; IQR – interquartile range; HFSS - high fat, salt or sugar; UPF – ultra-processed food.

**Table 3:** England ECEC: kcal consumed, and proportion of kcal consumed from HFSS, UPF and non-core foods summarised across child characteristics; estimates from univariable models not provided, but * indicate characteristics that showed evidence of association with the outcome in univariable analyses.

|  | |  |  |  | Proportion of total kcal consumed from: | | | | | |
| --- | --- | --- | --- | --- | --- | --- | --- | --- | --- | --- |
| England | |  | Kcal consumed | | HFSS foods | | UPFs | | Non-core foods | |
|  | | N | Median | IQR | Median | IQR | Median | IQR | Median | IQR |
| Overall | | 359 | 336.6 | (219.7, 454.9) | 47.4a | (23.1, 71.0) | 61.8a | (33.7, 83.8) | 39.7a | (13.6, 61.9) |
| Age | |  |  |  |  |  |  |  |  |  |
|  | 24-35 months | 86/357 (24.1%) | 309.2 | (207.4, 439.8) | 37.6* | (0.0, 53.5) | 50.0 | (23.1, 80.1) | 36.9 | (5.8, 53.5) |
|  | 36-47 months | 172/357 (48.2%) | 338.2 | (216.4, 457.4) | 49.4a* | (28.0, 72.9) | 64.9a | (33.1, 83.3) | 43.0a | (15.8, 63.0) |
|  | 48+ months | 99/357 (27.7%) | 381.7 | (237.3, 470.3) | 58.6* | (37.5, 74.8) | 66.9 | (43.5, 89.4) | 42.0 | (16.2, 63.8) |
| Gender | |  |  |  |  |  |  |  |  |  |
|  | Male | 175/358 (48.9%) | 323.3 | (215.5, 470.3) | 48.5b | (18.9, 75.2) | 60.9b | (23.2, 83.8) | 37.5b | (12.7, 61.8) |
|  | Female | 183/358 (51.1%) | 340.1 | (222.3, 446.7) | 46.9b | (25.4, 68.2) | 65.9b | (35.5, 83.8) | 41.0b | (16.8, 63.0) |
| zBMI | |  |  |  |  |  |  |  |  |  |
|  | Healthy weight | 254/336 (75.6%) | 344.1 | (222.3, 454.9) | 48.9b | (23.1, 73.3) | 63.6b | (34.0, 83.3) | 40.2b | (14.4, 61.4) |
|  | Unhealthy weight | 82/336 (24.4%) | 334.9 | (192.3, 462.8) | 47.7b | (27.8, 70.2) | 65.9b | (44.1, 86.4) | 38.2b | (16.8, 67.4) |
| Child deprivation | |  |  |  |  |  |  |  |  |  |
|  | High deprivation | 114/359 (31.8%) | 312.2 | (176.0, 413.2) | 50.3b* | (30.9, 74.8) | 66.9b | (33.7, 93.7) | 39.8b* | (16.8, 72.3) |
|  | Moderate deprivation | 166/359 (46.2%) | 355.1 | (229.9, 462.6) | 49.8b* | (25.0, 74.0) | 64.5b | (38.9, 84.0) | 41.5b* | (23.1, 60.2) |
|  | Low deprivation | 79/359 (22.0%) | 382.4 | (237.3, 496.4) | 39.1* | (0.0, 59.7) | 49.8 | (13.0, 71.6) | 34.0* | (0.0, 54.9) |
| Provider type | |  |  |  |  |  |  |  |  |  |
|  | Not attached to school | 255/359 (71.0%) | 324.4 | (209.6, 466.3) | 44.0a* | (15.7, 68.2) | 61.7a | (24.3, 83.8) | 36.6a | (9.5, 60.6) |
|  | Attached to school | 104/359 (29.0%) | 369.1 | (233.7, 440.1) | 59.6* | (38.7, 79.3) | 65.0 | (40.2, 84.9) | 45.5 | (31.2, 67.2) |
| Local government area | |  |  |  |  |  |  |  |  |  |
|  | Somerset | 217/359 (60.4%) | 359.6* | (229.2, 466.6) | 44.8b | (17.2, 67.8) | 63.0b | (33.9, 82.4) | 39.9b | (14.0, 63.0) |
|  | Swindon | 63/359 (17.5%) | 385.9* | (257.0, 470.3) | 49.1b | (32.7, 69.1) | 61.1b | (26.9, 83.7) | 39.2b | (12.7, 59.7) |
|  | Sandwell | 79/359 (22.0%) | 231.1* | (170.9, 406.2) | 56.8 | (27.4, 79.6) | 64.0 | (33.1, 91.9) | 38.5 | (15.3, 65.9) |
| Season of data collection | |  |  |  |  |  |  |  |  |  |
|  | Winter/Spring | 126/359 (35.1%) | 363.6 | (225.3, 466.3) | 50.8a | (17.0, 70.7) | 67.2a | (34.8, 82.7) | 39.5a | (9.6, 65.2) |
|  | Summer | 137/359 (38.2%) | 331.7 | (217.4, 451.1) | 51.3 | (32.6, 73.2) | 59.7 | (37.4, 88.9) | 41.7 | (16.7, 62.5) |
|  | Autumn | 96/359 (26.7%) | 333.6 | (209.5, 445.5) | 40.8 | (20.9, 67.6) | 57.9 | (24.9, 81.8) | 36.0 | (15.7, 57.2) |
| Lunch provision | |  |  |  |  |  |  |  |  |  |
|  | ECEC provided | 184/356 (51.7%) | 324.8 | (196.4, 442.9) | 36.9b* | (0.0, 60.6) | 40.1b* | (8.2, 72.9) | 30.1b* | (0.0, 53.5) |
|  | Packed lunch | 172/356 (48.3%) | 378.2 | (244.2, 467.2) | 61.0b* | (42.9, 75.6) | 73.8b* | (59.7, 88.1) | 50.1b* | (32.4, 65.3) |

Abbreviations: zBMI -standardised body mass index; ECEC - early childhood education and care; IQR – interquartile range; HFSS - high fat, salt or sugar; UPF – ultra-processed food.

a missing for 2 children; b missing for 1 child

**Table 4:** England and Scotland ECEC provided meals: kcal served, and proportion of kcal served from HFSS, UPF and non-core foods summarised across child characteristics; estimates from univariable models not provided, but * indicate characteristics that showed evidence of association with the outcome in univariable analyses.

|  | |  |  |  | Proportion of total kcal served from: | | | | | | | | |
| --- | --- | --- | --- | --- | --- | --- | --- | --- | --- | --- | --- | --- | --- |
| ECEC provided | |  | Kcal served | | | HFSS foods | | | UPFs | | | Non-core foods | | |
|  | | N | Median | IQR | Median | | IQR | Median | | IQR | Median | | IQR |
| Overall | | 352 | 403.3 | (304.7, 523.9) | 39.9 | | (12.2, 57.5) | 46.0 | | (23.1, 71.7) | 30.1 | | (0.0, 52.9) |
| Age | |  |  |  |  | |  |  | |  |  | |  |
|  | 24-35 months | 76/349 (21.8%) | 419.6 | (334.1, 526.2) | 36.5 | | (4.9, 47.9) | 43.2 | | (20.9, 68.3) | 28.7 | | (0.0, 47.2) |
|  | 36-47 months | 176/349 (50.4%) | 398.0 | (304.0, 531.9) | 40.9 | | (15.9, 64.1) | 44.9 | | (22.3, 70.5) | 33.5 | | (8.2, 58.5) |
|  | 48+ months | 97/349 (27.8%) | 388.6 | (283.0, 460.0) | 40.9 | | (11.3, 58.4) | 50.4 | | (33.6, 77.1) | 24.2 | | (0.0, 53.0) |
| Gender | |  |  |  |  | |  |  | |  |  | |  |
|  | Male | 174/350 (49.7%) | 411.7 | (295.4, 526.0) | 37.8 | | (0.0, 61.5) | 44.4 | | (16.8, 66.6) | 28.9 | | (0.0, 52.8) |
|  | Female | 176/350 (50.3%) | 400.3 | (326.6, 505.4) | 40.2 | | (17.4, 54.0) | 47.1 | | (31.1, 73.0) | 33.5 | | (5.8, 53.0) |
| zBMI | |  |  |  |  | |  |  | |  |  | |  |
|  | Healthy weight | 237/326 (72.7%) | 393.0 | (295.4, 505.4) | 39.6 | | (13.6, 58.4) | 45.5 | | (23.2, 73.4) | 30.1 | | (0.0, 52.3) |
|  | Unhealthy weight | 89/326 (27.3%) | 425.0 | (305.5, 534.6) | 40.0 | | (0.0, 56.3) | 50.5 | | (23.0, 71.1) | 33.6 | | (5.8, 57.2) |
| Child deprivation | |  |  |  |  | |  |  | |  |  | |  |
|  | High deprivation | 138/352 (39.2%) | 410.8 | (308.8, 508.6) | 40.1 | | (19.8, 62.8) | 46.7 | | (30.0, 72.7) | 34.8 | | (7.9, 57.5) |
|  | Moderate deprivation | 141/352 (40.1%) | 408.8 | (302.6, 528.9) | 41.9 | | (8.8, 56.5) | 45.5 | | (23.2, 77.1) | 29.5 | | (0.0, 52.8) |
|  | Low deprivation | 73/352 (20.7%) | 388.6 | (297.8, 505.4) | 36.3 | | (0.0, 54.0) | 46.1 | | (3.6, 64.2) | 18.9 | | (0.0, 47.6) |
| Provider type | |  |  |  |  | |  |  | |  |  | |  |
|  | Not attached to school | 230/352 (65.3%) | 403.3 | (292.7, 528.7) | 36.8 | | (0.0, 55.3) | 45.8 | | (18.1, 78.0) | 24.4 | | (0.0, 52.3) |
|  | Attached to school | 122/352 (34.7%) | 411.2 | (325.6, 508.6) | 44.9 | | (34.2, 61.1) | 46.1 | | (33.6, 63.8) | 35.7 | | (10.6, 59.4) |
| Local government area | |  |  |  |  | |  |  | |  |  | |  |
|  | Somerset | 110/352 (31.3%) | 406.3 | (283.6, 482.0) | 34.0 | | (0.0, 48.2) | 43.1 | | (6.6, 67.1) | 29.5 | | (0.0, 48.2) |
|  | Swindon | 23/352 (6.5%) | 541.4 | (423.7, 592.4) | 42.8 | | (15.9, 56.3) | 23.0 | | (2.0, 51.4) | 28.6 | | (8.8, 51.4) |
|  | Sandwell | 51/352 (14.5%) | 441.6 | (287.0, 528.9) | 37.8 | | (24.3, 62.8) | 35.5 | | (21.8, 78.2) | 20.7 | | (11.3, 41.9) |
|  | Arran and Ayrshire | 168/352 (47.7%) | 380.4 | (301.3, 497.0) | 47.5 | | (20.5, 64.5) | 52.7 | | (36.4, 75.4) | 34.6 | | (0.0, 57.1) |
| Country | |  |  |  |  | |  |  | |  |  | |  |
|  | England | 184/352 (52.3%) | 418.9 | (332.4, 529.2) | 36.2 | | (0.0, 52.4) | 36.9 | | (11.8, 63.7) | 27.8 | | (0.0, 46.9) |
|  | Scotland | 168/352 (47.7%) | 380.4 | (301.3, 497.0) | 47.5 | | (20.5, 64.5) | 52.7 | | (36.4, 75.4) | 34.6 | | (0.0, 57.1) |
| Season of data collection | |  |  |  |  | |  |  | |  |  | |  |
|  | Winter/Spring | 102/352 (29.0%) | 403.3 | (339.7, 513.9) | 35.2 | | (0.0, 61.6) | 45.1 | | (21.8, 72.8) | 17.6 | | (0.0, 47.6) |
|  | Summer | 110/352 (31.3%) | 399.6 | (280.4, 523.4) | 48.0 | | (28.8, 60.8) | 48.9 | | (26.3, 72.4) | 30.1 | | (8.8, 53.0) |
|  | Autumn | 140/352 (39.8%) | 404.1 | (299.0, 526.5) | 37.7 | | (10.5, 54.0) | 45.2 | | (22.8, 68.2) | 34.7 | | (5.3, 52.5) |

Abbreviations: zBMI -standardised body mass index; ECEC - early childhood education and care; IQR – interquartile range; HFSS - high fat, salt or sugar; UPF – ultra-processed food.

**Table 5:** England and Scotland ECEC provided meals: kcal consumed, and proportion of kcal consumed from HFSS, UPF and non-core foods summarised across child characteristics; estimates from univariable models not provided, but * indicate characteristics that showed evidence of association with the outcome in univariable analyses.

|  | |  |  |  | Proportion of total kcal consumed from: | | | | | |
| --- | --- | --- | --- | --- | --- | --- | --- | --- | --- | --- |
| ECEC provided | |  | Kcal consumed | | HFSS foods | | UPFs | | Non-core foods | |
|  | | N | Median | IQR | Median | IQR | Median | IQR | Median | IQR |
| Overall | | 352 | 306.1 | (199.4, 413.7) | 39.7a | (0.0, 67.0) | 49.7a | (21.2, 79.3) | 31.5a | (0.0, 58.7) |
| Age | |  |  |  |  |  |  |  |  |  |
|  | 24-35 months | 76/349 (21.8%) | 323.5 | (208.1, 443.2) | 36.1 | (0.0, 52.8) | 46.3 | (11.5, 79.2) | 32.1 | (0.0, 49.9) |
|  | 36-47 months | 176/349 (50.4%) | 288.8 | (199.4, 416.8) | 40.5b | (0.0, 70.4) | 48.7b | (18.7, 75.4) | 33.1b | (0.0, 61.8) |
|  | 48+ months | 97/349 (27.8%) | 310.2 | (172.1, 388.6) | 41.0b | (0.0, 67.2) | 57.7b | (33.7, 87.0) | 26.6b | (0.0, 56.8) |
| Gender | |  |  |  |  |  |  |  |  |  |
|  | Male | 174/350 (49.7%) | 294.0 | (207.2, 419.9) | 40.2b | (0.0, 71.7) | 47.0b | (8.6, 78.8) | 31.0b | (0.0, 61.4) |
|  | Female | 176/350 (50.3%) | 318.8 | (198.0, 408.4) | 39.3b | (0.0, 63.4) | 52.3b | (30.8, 82.0) | 33.1b | (0.0, 57.5) |
| zBMI | |  |  |  |  |  |  |  |  |  |
|  | Healthy weight | 237/326 (72.7%) | 287.7 | (199.5, 409.5) | 40.1 | (0.0, 67.0) | 48.7 | (18.9, 80.0) | 30.8 | (0.0, 55.6) |
|  | Unhealthy weight | 89/326 (27.3%) | 315.9 | (191.9, 450.8) | 39.0a | (0.0, 66.4) | 63.0a | (26.9, 85.7) | 38.6a | (5.8, 67.9) |
| Child deprivation | |  |  |  |  |  |  |  |  |  |
|  | High deprivation | 138/352 (39.2%) | 318.8 | (213.6, 413.2) | 40.2 | (2.8, 69.9) | 56.9 | (28.2, 81.3) | 35.7 | (0.0, 65.9) |
|  | Moderate deprivation | 141/352 (40.1%) | 292.9 | (180.5, 405.4) | 41.1a | (0.0, 67.4) | 49.5a | (24.3, 85.5) | 30.8a | (0.0, 55.5) |
|  | Low deprivation | 73/352 (20.7%) | 297.8 | (220.8, 439.8) | 36.9 | (0.0, 61.8) | 45.0 | (2.3, 71.3) | 14.1 | (0.0, 52.3) |
| Provider type | |  |  |  |  |  |  |  |  |  |
|  | Not attached to school | 230/352 (65.3%) | 309.4 | (191.9, 439.4) | 37.0a | (0.0, 64.5) | 48.1a | (12.9, 81.9) | 27.1a | (0.0, 55.5) |
|  | Attached to school | 122/352 (34.7%) | 288.8 | (222.8, 384.3) | 41.7 | (28.0, 74.9) | 53.2 | (32.0, 75.4) | 39.0 | (0.0, 67.0) |
| Local government area | |  |  |  |  |  |  |  |  |  |
|  | Somerset | 110/352 (31.3%) | 298.1* | (192.3, 411.8) | 32.8b | (0.0, 53.4) | 37.7b* | (5.3, 72.4) | 23.2b | (0.0, 49.1) |
|  | Swindon | 23/352 (6.5%) | 462.6* | (355.0, 519.3) | 46.2 | (12.7, 61.1) | 24.3* | (2.1, 52.0) | 31.9 | (9.5, 60.6) |
|  | Sandwell | 51/352 (14.5%) | 243.5* | (174.4, 425.1) | 41.9 | (16.8, 79.3) | 46.3* | (21.8, 91.9) | 33.9 | (6.9, 61.4) |
|  | Arran and Ayrshire | 168/352 (47.7%) | 290.3* | (202.3, 375.2) | 46.1b | (0.0, 70.5) | 60.5b* | (37.1, 86.5) | 33.9b | (0.0, 60.5) |
| Country | |  |  |  |  |  |  |  |  |  |
|  | England | 184/352 (52.3%) | 324.8 | (196.4, 442.9) | 36.9b | (0.0, 60.6) | 40.1b | (8.2, 72.9) | 30.1b | (0.0, 53.5) |
|  | Scotland | 168/352 (47.7%) | 290.3 | (202.3, 375.2) | 46.1b | (0.0, 70.5) | 60.5b | (37.1, 86.5) | 33.9b | (0.0, 60.5) |
| Season of data collection | |  |  |  |  |  |  |  |  |  |
|  | Winter/Spring | 102/352 (29.0%) | 334.2* | (215.5, 450.8) | 37.1b* | (0.0, 64.4) | 50.6b | (13.2, 81.8) | 16.8b | (0.0, 50.6) |
|  | Summer | 110/352 (31.3%) | 285.0* | (207.2, 416.2) | 46.1* | (21.3, 72.6) | 49.2 | (23.2, 80.0) | 34.9 | (0.0, 61.8) |
|  | Autumn | 140/352 (39.8%) | 291.4* | (177.3, 385.7) | 37.8b* | (0.0, 66.7) | 49.8b | (18.7, 78.8) | 33.8b | (0.0, 59.0) |

Abbreviations: zBMI -standardised body mass index; ECEC - early childhood education and care; IQR – interquartile range; HFSS - high fat, salt or sugar; UPF – ultra-processed food.

a missing for 2 children; b missing for 1 child

**Table 6:** Listing of food classifications for unique food items recorded in the NAP SACC UK cohort at baseline; high fat salt and sugar content (HFSS), ultra-processed food (UPF) and non-core classification given.

| **NDNS code** | **Food name** | **Main food group** | **HFSS classification** | **UPF classification** | **Non-core classification** |
| --- | --- | --- | --- | --- | --- |
| 27 | Pasta macaroni boiled | Pasta rice and other cereals | Not HFSS food | Not UPF | Core food |
| 30 | Pasta noodles boiled | Pasta rice and other cereals | Not HFSS food | Not UPF | Core food |
| 34 | Pasta spaghetti boiled white | Pasta rice and other cereals | Not HFSS food | Not UPF | Core food |
| 38 | Pasta macaroni canned in cheese sauce | Pasta rice and other cereals | HFSS food | UPF | Core food |
| 41 | Pasta,spaghetti, canned in tomato sauce | Pasta rice and other cereals | Not HFSS food | UPF | Core food |
| 42 | White rice basmati boiled | Pasta rice and other cereals | Not HFSS food | Not UPF | Core food |
| 49 | Rice, brown, boiled | Pasta rice and other cereals | Not HFSS food | Not UPF | Core food |
| 54 | Rice white easy cook dried | Pasta rice and other cereals | Not HFSS food | Not UPF | Core food |
| 58 | Rice white long polished boiled | Pasta rice and other cereals | Not HFSS food | Not UPF | Core food |
| 102 | Brown bread no added bran | Brown granary and wheatgerm bread | Not HFSS food | UPF | Core food |
| 112 | Bread granary | Brown granary and wheatgerm bread | Not HFSS food | UPF | Core food |
| 116 | Bread pitta white | White bread | Not HFSS food | Not UPF | Core food |
| 117 | Bread pitta wholemeal | Wholemeal bread | Not HFSS food | UPF | Core food |
| 120 | Bread, white sliced, not fortified | White bread | Not HFSS food | UPF | Core food |
| 121 | Bread white crusty | White bread | Not HFSS food | UPF | Core food |
| 126 | Bread white toasted | White bread | Not HFSS food | UPF | Core food |
| 127 | Bread white french stick | White bread | Not HFSS food | Not UPF | Core food |
| 133 | Bread wholemeal | Wholemeal bread | Not HFSS food | UPF | Core food |
| 138 | Bread wholemeal toasted | Wholemeal bread | Not HFSS food | UPF | Core food |
| 143 | Chapati brown no fat | Brown granary and wheatgerm bread | Not HFSS food | UPF | Core food |
| 149 | Malt loaf fruit purchased | Buns cakes pastries & fruit pies | Not HFSS food | UPF | Non-core food |
| 153 | Papadums/poppadoms grilled or baked | Pasta rice and other cereals | HFSS food | Not UPF | Non-core food |
| 157 | Rolls hamburger buns | White bread | Not HFSS food | UPF | Core food |
| 158 | Rolls white crusty | White bread | Not HFSS food | UPF | Core food |
| 159 | Rolls, white soft, not fortified | White bread | Not HFSS food | UPF | Core food |
| 166 | Croissants plain not filled | Buns cakes pastries & fruit pies | HFSS food | UPF | Non-core food |
| 167 | Whole meal malt loaf | Buns cakes pastries & fruit pies | HFSS food | UPF | Non-core food |
| 251 | Biscuits cheese flavoured | Biscuits | HFSS food | UPF | Non-core food |
| 252 | Cheese sandwich biscuits | Biscuits | HFSS food | UPF | Non-core food |
| 254 | Chocolate short or sweet biscuits half coated | Biscuits | HFSS food | UPF | Non-core food |
| 255 | Cream crackers | Biscuits | HFSS food | UPF | Core food |
| 258 | Crispbreads extra light | Biscuits | HFSS food | UPF | Non-core food |
| 259 | Digestive plain | Biscuits | HFSS food | UPF | Non-core food |
| 260 | Digestives half coated in chocolate | Biscuits | HFSS food | UPF | Non-core food |
| 265 | Jam filled biscuits eg jammie dodgers | Biscuits | HFSS food | UPF | Non-core food |
| 268 | Cream sandwich biscuits | Biscuits | HFSS food | UPF | Non-core food |
| 270 | Short sweet biscuits | Biscuits | HFSS food | UPF | Non-core food |
| 271 | Shortbread homemade not wholemeal | Biscuits | HFSS food | Not UPF | Non-core food |
| 272 | Biscuits wafer sandwich cream filled | Biscuits | HFSS food | UPF | Non-core food |
| 274 | Water biscuit | Biscuits | HFSS food | UPF | Non-core food |
| 279 | Saltines eg tuc ritz | Biscuits | HFSS food | UPF | Non-core food |
| 302 | Banana cake, homemade | Buns cakes pastries & fruit pies | HFSS food | Not UPF | Non-core food |
| 304 | Battenburg, purchased | Buns cakes pastries & fruit pies | HFSS food | UPF | Non-core food |
| 308 | Sponge cake chocolate with margarine not pufa, butter icing, homemade | Buns cakes pastries & fruit pies | HFSS food | Not UPF | Non-core food |
| 309 | Chocolate cup cakes homemade | Buns cakes pastries & fruit pies | HFSS food | Not UPF | Non-core food |
| 310 | Chocolate crispie cakes (cornflakes & rice krispies) purchased or homemade | Buns cakes pastries & fruit pies | HFSS food | UPF | Non-core food |
| 323 | Doughnut ring, not iced or glazed, purchased | Buns cakes pastries & fruit pies | HFSS food | UPF | Non-core food |
| 329 | Fancy iced cakes | Buns cakes pastries & fruit pies | HFSS food | UPF | Non-core food |
| 349 | Madeira cake | Buns cakes pastries & fruit pies | HFSS food | UPF | Non-core food |
| 350 | Meringues | Eggs and egg dishes | HFSS food | UPF | Core food |
| 357 | Flapjacks homemade | Biscuits | HFSS food | Not UPF | Non-core food |
| 369 | Plain scones | Buns cakes pastries & fruit pies | HFSS food | Not UPF | Non-core food |
| 370 | Rock cakes | Buns cakes pastries & fruit pies | HFSS food | Not UPF | Non-core food |
| 373 | Scotch pancakes | Buns cakes pastries & fruit pies | HFSS food | UPF | Non-core food |
| 375 | Sponge cake fatless purchased including sponge fingers | Buns cakes pastries & fruit pies | HFSS food | UPF | Non-core food |
| 378 | Sponge not w/meal not choc with marg butter icing | Buns cakes pastries & fruit pies | HFSS food | Not UPF | Non-core food |
| 379 | Sponge cake/ swiss roll, not chocolate, fresh cream & jam filling, purchased | Buns cakes pastries & fruit pies | HFSS food | UPF | Non-core food |
| 383 | Swiss roll individual chocolate coated purchased | Buns cakes pastries & fruit pies | HFSS food | UPF | Non-core food |
| 503 | Fruit crumble not apple not wholemeal | Puddings | Not HFSS food | Not UPF | Non-core food |
| 546 | Custard ready to serve canned | Puddings | Not HFSS food | UPF | Core food |
| 548 | Custard made with semi-skimmed milk and sugar | Puddings | Not HFSS food | UPF | Core food |
| 549 | Custard with powder skimmed milk and sugar | Puddings | Not HFSS food | UPF | Core food |
| 553 | Jelly made with water | Puddings | Not HFSS food | UPF | Core food |
| 559 | Rice pudding canned | Puddings | Not HFSS food | UPF | Core food |
| 569 | Steamed sponge pudding with syrup or jam | Puddings | HFSS food | Not UPF | Non-core food |
| 576 | Yorkshire pudding made with whole milk | Pasta rice and other cereals | HFSS food | UPF | Non-core food |
| 582 | Chocolate mousse | Yogurt fromage frais and dairy desserts | HFSS food | Not UPF | Non-core food |
| 585 | Sorbet, fruit purchased | Ice cream | HFSS food | UPF | Non-core food |
| 602 | Milk whole summer pasteurised | Whole milk | Not HFSS food | Not UPF | Core food |
| 603 | Milk whole pasteurised winter | Whole milk | HFSS food | Not UPF | Core food |
| 608 | Milk semi-skimmed pasteurised summer | Semi skimmed milk | Not HFSS food | Not UPF | Core food |
| 644 | Cream whipping fresh | Other milk and cream | HFSS food | Not UPF | Non-core food |
| 654 | Cheese cheddar english | Cheese | HFSS food | Not UPF | Core food |
| 660 | Cheese cheddar vegetarian | Cheese | HFSS food | Not UPF | Core food |
| 668 | Cheese edam full fat | Cheese | HFSS food | Not UPF | Core food |
| 670 | Cheese gouda | Cheese | HFSS food | Not UPF | Core food |
| 672 | Cheese leicestershire | Cheese | HFSS food | Not UPF | Core food |
| 675 | Cheese mozzarella | Cheese | HFSS food | Not UPF | Core food |
| 676 | Cheese parmesan | Cheese | HFSS food | Not UPF | Core food |
| 685 | Cheese spreads triangles plain | Cheese | HFSS food | UPF | Core food |
| 701 | Yogurt, whole milk, fruit | Yogurt fromage frais and dairy desserts | HFSS food | UPF | Core food |
| 702 | Yogurt , whole milk, natural, unsweetened | Yogurt fromage frais and dairy desserts | Not HFSS food | Not UPF | Core food |
| 704 | Yogurt low fat fruit | Yogurt fromage frais and dairy desserts | Not HFSS food | UPF | Core food |
| 720 | Ice cream, standard dairy (made with milk/cream) , vanilla, hard | Ice cream | HFSS food | UPF | Non-core food |
| 725 | Ice cream, standard dairy, flavoured, not vanilla or chocolate or nuts etc, soft scoop | Ice cream | HFSS food | UPF | Non-core food |
| 755 | Eggs boiled | Eggs and egg dishes | Not HFSS food | Not UPF | Core food |
| 756 | Egg fried in blended oil | Eggs and egg dishes | Not HFSS food | Not UPF | Core food |
| 763 | Omelette cooked in blended oil | Eggs and egg dishes | HFSS food | Not UPF | Core food |
| 819 | Macaroni cheese not canned | Pasta rice and other cereals | HFSS food | Not UPF | Non-core food |
| 851 | Butter salted | Butter | HFSS food | Not UPF | Non-core food |
| 852 | Butter unsalted | Butter | HFSS food | Not UPF | Non-core food |
| 860 | Hard block margarines and fats (75-90% fat) | Other margarine fats and oils | HFSS food | UPF | Non-core food |
| 864 | Soft margarine not pufa not low fat | Other margarine fats and oils | HFSS food | UPF | Non-core food |
| 941 | Beef minced stewed lean & fat | Beef veal and dishes | Not HFSS food | Not UPF | Core food |
| 946 | Beef mince skim gravy & veg | Beef veal and dishes | Not HFSS food | Not UPF | Core food |
| 1039 | Ham not smoked | Bacon and ham | HFSS food | UPF | Non-core food |
| 1068 | Chicken boiled light meat only | Chicken and turkey dishes | Not HFSS food | Not UPF | Core food |
| 1088 | Chicken roast meat only | Chicken and turkey dishes | Not HFSS food | Not UPF | Core food |
| 1109 | Chick.burger coated fried veg oil frozen/chilled | Coated chicken | HFSS food | UPF | Core food |
| 1167 | Venison roast meat only | Other meat and meat products | Not HFSS food | Not UPF | Non-core food |
| 1235 | Corned beef | Other meat and meat products | HFSS food | UPF | Non-core food |
| 1251 | Haggis boiled | Other meat and meat products | HFSS food | UPF | Non-core food |
| 1266 | Beefburgers 100% fried | Burgers and kebabs | HFSS food | UPF | Non-core food |
| 1274 | Salami | Other meat and meat products | HFSS food | UPF | Non-core food |
| 1280 | Sausages, pork, grilled | Sausages | HFSS food | UPF | Non-core food |
| 1302 | Minced beef pie top pastry | Meat pies and pastries | HFSS food | Not UPF | Non-core food |
| 1306 | Sausage roll flaky pastry | Meat pies and pastries | HFSS food | UPF | Non-core food |
| 1309 | Steak pie pastry top only | Meat pies and pastries | HFSS food | Not UPF | Non-core food |
| 1323 | Bolognese sauce | Beef veal and dishes | Not HFSS food | Not UPF | Core food |
| 1333 | Cheeseburger takeaway not qter pounder | Burgers and kebabs | HFSS food | UPF | Non-core food |
| 1337 | Garlic sausage | Other meat and meat products | HFSS food | UPF | Non-core food |
| 1338 | Luncheon meat not canned | Other meat and meat products | HFSS food | UPF | Non-core food |
| 1348 | Lasagne homemade | Beef veal and dishes | HFSS food | Not UPF | Core food |
| 1357 | Cottage pie | Beef veal and dishes | Not HFSS food | Not UPF | Core food |
| 1362 | Chicken curry korma style with cream or coconut | Chicken and turkey dishes | Not HFSS food | Not UPF | Core food |
| 1416 | Cod in breadcrumbs fry blended | White fish coated or fried | Not HFSS food | Not UPF | Core food |
| 1522 | Salmon, smoked, cold smoked only | Oily fish | HFSS food | Not UPF | Core food |
| 1534 | Tuna canned in brine fish only | Other white fish shellfish & fish dishes | Not HFSS food | Not UPF | Core food |
| 1573 | Prawns boiled flesh only | Other white fish shellfish & fish dishes | HFSS food | Not UPF | Core food |
| 1604 | Fish pie | Other white fish shellfish & fish dishes | Not HFSS food | Not UPF | Core food |
| 1606 | Fishcakes, white fish, coated in breadcrumbs baked/grilled | White fish coated or fried | HFSS food | UPF | Core food |
| 1615 | Fish fingers grilled | White fish coated or fried | Not HFSS food | UPF | Core food |
| 1638 | Fish in sauce | Other white fish shellfish & fish dishes | Not HFSS food | Not UPF | Core food |
| 1662 | Beans baked canned | Vegetables not raw | Not HFSS food | UPF | Core food |
| 1671 | French beans/green beans boiled | Vegetables not raw | Not HFSS food | Not UPF | Core food |
| 1686 | Soya bean curd tofu steamed | Vegetables not raw | Not HFSS food | UPF | Core food |
| 1691 | Beetroot boiled (salted water) | Vegetables not raw | Not HFSS food | Not UPF | Core food |
| 1693 | Broccoli spears calabrese fresh boiled | Vegetables not raw | Not HFSS food | Not UPF | Core food |
| 1704 | Cabbage - savoy fresh boiled | Vegetables not raw | Not HFSS food | Not UPF | Core food |
| 1710 | Carrots, old, raw | Salad and other raw vegetables | Not HFSS food | Not UPF | Core food |
| 1712 | Carrots, young, fresh, raw | Salad and other raw vegetables | Not HFSS food | Not UPF | Core food |
| 1714 | Carrots-frozen boiled | Vegetables not raw | Not HFSS food | Not UPF | Core food |
| 1719 | Cauliflower-fresh boiled | Vegetables not raw | Not HFSS food | Not UPF | Core food |
| 1726 | Celery fresh boiled | Vegetables not raw | Not HFSS food | Not UPF | Core food |
| 1733 | Courgettes fresh raw | Salad and other raw vegetables | Not HFSS food | Not UPF | Core food |
| 1734 | Courgette-boiled | Vegetables not raw | Not HFSS food | Not UPF | Core food |
| 1740 | Cucumber-raw | Salad and other raw vegetables | Not HFSS food | Not UPF | Core food |
| 1743 | Garlic raw | Salad and other raw vegetables | Not HFSS food | Not UPF | Core food |
| 1758 | Lentils split boiled | Vegetables not raw | Not HFSS food | Not UPF | Core food |
| 1762 | Lettuce unspecified raw | Salad and other raw vegetables | Not HFSS food | Not UPF | Core food |
| 1771 | Mixed vegetables frozen boiled salted | Vegetables not raw | Not HFSS food | Not UPF | Core food |
| 1779 | Mushrooms stewed or grilled | Vegetables not raw | Not HFSS food | Not UPF | Core food |
| 1789 | Onions fried blended vegetable oil | Vegetables not raw | Not HFSS food | Not UPF | Core food |
| 1804 | Parsnip roast in blended oil | Vegetables not raw | Not HFSS food | Not UPF | Core food |
| 1806 | Peas fresh raw | Salad and other raw vegetables | Not HFSS food | Not UPF | Core food |
| 1808 | Peas frozen boiled | Vegetables not raw | Not HFSS food | Not UPF | Core food |
| 1817 | Hummus, not canned | Vegetables not raw | HFSS food | Not UPF | Core food |
| 1823 | Peppers green fresh-raw | Salad and other raw vegetables | Not HFSS food | Not UPF | Core food |
| 1829 | Potatoes, old boiled, flesh only | Other potatoes potato salads & dishes | Not HFSS food | Not UPF | Core food |
| 1830 | Potatoes new boiled skins eaten | Other potatoes potato salads & dishes | Not HFSS food | Not UPF | Core food |
| 1831 | Potatoes old mashed & butter | Other potatoes potato salads & dishes | Not HFSS food | Not UPF | Core food |
| 1834 | Potatoes old baked flesh & skin | Other potatoes potato salads & dishes | Not HFSS food | Not UPF | Core food |
| 1837 | Potato new baked flesh and skin | Other potatoes potato salads & dishes | Not HFSS food | Not UPF | Core food |
| 1841 | Potatoes old roast in blended vegetable oil | Chips fried & roast potatoes and potato products | Not HFSS food | Not UPF | Core food |
| 1872 | Chips frozen straight cut blended veg oil | Chips fried & roast potatoes and potato products | Not HFSS food | UPF | Non-core food |
| 1879 | Potato waffles fried blended | Chips fried & roast potatoes and potato products | HFSS food | UPF | Non-core food |
| 1888 | Pots old sauteed in blended | Chips fried & roast potatoes and potato products | Not HFSS food | Not UPF | Non-core food |
| 1901 | Potato croquettes fried in blended oil | Chips fried & roast potatoes and potato products | Not HFSS food | UPF | Non-core food |
| 1922 | Sweetcorn on the cob boiled (leftover cob not weighed) | Vegetables not raw | Not HFSS food | Not UPF | Core food |
| 1931 | Tomatoes raw | Salad and other raw vegetables | Not HFSS food | Not UPF | Core food |
| 1941 | Turnips-boiled | Vegetables not raw | Not HFSS food | Not UPF | Core food |
| 1943 | Vegetable curry | Vegetables not raw | Not HFSS food | Not UPF | Core food |
| 1951 | Apples eating raw flesh only | Fruit | Not HFSS food | Not UPF | Core food |
| 1952 | Apples eating raw flesh & skin only | Fruit | Not HFSS food | Not UPF | Core food |
| 1977 | Bananas raw flesh only | Fruit | Not HFSS food | Not UPF | Core food |
| 1985 | Blackberries raw | Fruit | Not HFSS food | Not UPF | Core food |
| 2021 | Dates dried not stones | Fruit | Not HFSS food | Not UPF | Core food |
| 2030 | Fruit salad fruit cocktail canned in fruit juice fruit & juice | Fruit | Not HFSS food | Not UPF | Core food |
| 2036 | Fresh fruit salad no sugar | Fruit | Not HFSS food | Not UPF | Core food |
| 2041 | Grapes black & red raw flesh & skin only not pips | Fruit | Not HFSS food | Not UPF | Core food |
| 2043 | Grapes white raw flesh & skin only not pips | Fruit | Not HFSS food | Not UPF | Core food |
| 2077 | Mandarin oranges canned in fruit juice fruit only | Fruit | Not HFSS food | Not UPF | Core food |
| 2078 | Mangoes fresh flesh only | Fruit | Not HFSS food | Not UPF | Core food |
| 2081 | Melons canteloupe charantais flesh only | Fruit | Not HFSS food | Not UPF | Core food |
| 2083 | Melon honeydew galia ogen flesh only | Fruit | Not HFSS food | Not UPF | Core food |
| 2085 | Watermelon flesh only | Fruit | Not HFSS food | Not UPF | Core food |
| 2088 | Nectarines raw flesh & skin only no stones | Fruit | Not HFSS food | Not UPF | Core food |
| 2090 | Olives in brine flesh & skin only | Fruit | Not HFSS food | Not UPF | Core food |
| 2092 | Oranges raw flesh only | Fruit | Not HFSS food | Not UPF | Core food |
| 2101 | Peaches fresh flesh & skin only | Fruit | Not HFSS food | Not UPF | Core food |
| 2109 | Peaches canned in fruit juice fruit only | Fruit | Not HFSS food | Not UPF | Core food |
| 2117 | Pineapple fresh flesh only | Fruit | Not HFSS food | Not UPF | Core food |
| 2122 | Pineapple canned in fruit juice fruit only | Fruit | Not HFSS food | Not UPF | Core food |
| 2123 | Plums dessert raw flesh & skin only victoria | Fruit | Not HFSS food | Not UPF | Core food |
| 2142 | Raisins dried weight | Fruit | HFSS food | Not UPF | Core food |
| 2143 | Raspberries raw | Fruit | Not HFSS food | Not UPF | Core food |
| 2153 | Strawberries raw | Fruit | Not HFSS food | Not UPF | Core food |
| 2156 | Sultanas dried weight | Fruit | HFSS food | Not UPF | Core food |
| 2157 | Tangerines mandarins clementines flesh only | Fruit | Not HFSS food | Not UPF | Core food |
| 2160 | Apple sauce canned | Fruit | Not HFSS food | Not UPF | Core food |
| 2188 | Mixed nuts unroasted unsalted | Nuts and seeds | Not HFSS food | Not UPF | Core food |
| 2195 | Peanut butter smooth not wholenut | Nuts and seeds | HFSS food | Not UPF | Core food |
| 2205 | Sugar white | Sugars preserves and sweet spreads | HFSS food | Not UPF | Non-core food |
| 2211 | Chocolate spread | Sugars preserves and sweet spreads | HFSS food | UPF | Non-core food |
| 2212 | Chocolate + nut spread | Sugars preserves and sweet spreads | HFSS food | UPF | Non-core food |
| 2214 | Honey (in jars) | Sugars preserves and sweet spreads | HFSS food | Not UPF | Non-core food |
| 2215 | Jam with edible seeds purchased | Sugars preserves and sweet spreads | HFSS food | Not UPF | Non-core food |
| 2240 | Pears eating raw flesh & skin only no core | Fruit | Not HFSS food | Not UPF | Core food |
| 2254 | Milk chocolate bar | Chocolate confectionery | HFSS food | UPF | Non-core food |
| 2255 | Dark chocolate no additions, less than 50% cocoa solids eg bournville | Chocolate confectionery | HFSS food | UPF | Non-core food |
| 2256 | Chocolate covered caramels cadburys caramel | Chocolate confectionery | HFSS food | UPF | Non-core food |
| 2264 | Marshmallows | Sugar confectionery | HFSS food | UPF | Non-core food |
| 2269 | Popcorn sweet | Sugar confectionery | HFSS food | UPF | Non-core food |
| 2277 | Kit kat | Chocolate confectionery | HFSS food | UPF | Non-core food |
| 2317 | Apple juice unsweetened canned | Fruit juice | Not HFSS food | UPF | Core food |
| 2318 | Apple juice unsweetened cartons pasteurised | Fruit juice | Not HFSS food | Not UPF | Core food |
| 2336 | Orange juice unsweetened canned | Fruit juice | Not HFSS food | UPF | Core food |
| 2357 | Mixed fruit juice pasteurised | Fruit juice | Not HFSS food | Not UPF | Core food |
| 2425 | Gravy thickened no fat | Miscellaneous | Not HFSS food | UPF | Non-core food |
| 2431 | Marmite | Miscellaneous | HFSS food | UPF | Non-core food |
| 2432 | Mayonnaise (retail) | Miscellaneous | HFSS food | UPF | Non-core food |
| 2440 | Pickle sweet | Miscellaneous | HFSS food | UPF | Non-core food |
| 2448 | Tomato ketchup | Miscellaneous | HFSS food | UPF | Core food |
| 2450 | Tomato sauce homemade | Miscellaneous | Not HFSS food | Not UPF | Core food |
| 2456 | Beetroot pickled in vinegar | Vegetables not raw | Not HFSS food | Not UPF | Core food |
| 2459 | Stuffing, dry mix made up | Miscellaneous | Not HFSS food | UPF | Core food |
| 2460 | Tomato puree canned | Miscellaneous | Not HFSS food | Not UPF | Core food |
| 2463 | Cream of chicken soup canned (ready to serve) | Miscellaneous | Not HFSS food | UPF | Core food |
| 2469 | Lentil soup | Miscellaneous | Not HFSS food | Not UPF | Core food |
| 2478 | Cream of tomato soup canned | Miscellaneous | Not HFSS food | UPF | Core food |
| 2483 | Vegetable soup canned | Miscellaneous | Not HFSS food | UPF | Core food |
| 2629 | Mixed nuts and raisins unsalted | Nuts and seeds | Not HFSS food | Not UPF | Core food |
| 2644 | Sponge cake with margarine, not chocolate, homemade | Buns cakes pastries & fruit pies | HFSS food | Not UPF | Non-core food |
| 2645 | Chocolate sauce | Sugars preserves and sweet spreads | HFSS food | UPF | Non-core food |
| 2646 | Beans baked canned low sugar/ no added sugar | Vegetables not raw | Not HFSS food | UPF | Core food |
| 2672 | Chicken burger coated grilled | Coated chicken | HFSS food | UPF | Core food |
| 2689 | Lemon juice 50% vit c loss | Fruit juice | Not HFSS food | Not UPF | Core food |
| 2691 | Low fat not baked crisps | Crisps and savoury snacks | HFSS food | UPF | Non-core food |
| 2703 | Cheese soft full fat. Philadelphia type | Cheese | HFSS food | Not UPF | Core food |
| 3026 | White sauce semi skimmed milk | Miscellaneous | HFSS food | UPF | Non-core food |
| 3082 | Chocolate cake no filling or icing, purchased | Buns cakes pastries & fruit pies | HFSS food | UPF | Non-core food |
| 3091 | Chocolate sponge cake made with reduced fat spread, homemade | Buns cakes pastries & fruit pies | HFSS food | Not UPF | Non-core food |
| 3115 | Flaky / puff pastry purchased, cooked | Buns cakes pastries & fruit pies | HFSS food | UPF | Non-core food |
| 3179 | Angel delight semi skimmed milk | Puddings | HFSS food | UPF | Non-core food |
| 3189 | Wholemeal fruit scones | Buns cakes pastries & fruit pies | HFSS food | Not UPF | Non-core food |
| 3267 | Rice cakes, not flavoured | Biscuits | Not HFSS food | UPF | Non-core food |
| 3490 | Chicken hotpot, reduced fat e.g. ww | Chicken and turkey dishes | Not HFSS food | UPF | Core food |
| 3543 | Chickpea and vegetable curry with cook in sauce and peppers | Vegetables not raw | Not HFSS food | Not UPF | Core food |
| 3763 | Fruit winders, kelloggs | Sugar confectionery | HFSS food | UPF | Non-core food |
| 3829 | Beef minced fried in vegetable oil | Beef veal and dishes | HFSS food | Not UPF | Core food |
| 3882 | Kellogg's cereal+milk bars only eg kellogg's rice krispie,coco pops,frosties,c'flakes cereal+milk ba | Other breakfast cereals | HFSS food | UPF | Non-core food |
| 3889 | Soft margarine, not polyunsaturated, low in trans | Other margarine fats and oils | HFSS food | UPF | Non-core food |
| 3905 | Chocolate sponge cake made with butter, homemade butter icing | Buns cakes pastries & fruit pies | HFSS food | Not UPF | Non-core food |
| 3911 | Rice pudding with or without fruit, reduced fat, not canned eg. Muller rice 99% fat free | Puddings | Not HFSS food | UPF | Core food |
| 3930 | Cook-in-sauce, curry flavour, reduced fat e.g. tesco healthy living tikka sauce | Miscellaneous | Not HFSS food | UPF | Core food |
| 3949 | Savoury rice (rice, peas, carrots, pepper) tesco only, microwavable | Pasta rice and other cereals | Not HFSS food | UPF | Core food |
| 3954 | Butternut squash, baked | Vegetables not raw | Not HFSS food | Not UPF | Core food |
| 3986 | Cook in sauce, white sauce based, canned | Miscellaneous | HFSS food | UPF | Non-core food |
| 3987 | American muffins, not chocolate, not low fat | Buns cakes pastries & fruit pies | HFSS food | UPF | Non-core food |
| 3991 | Potato wedges baked | Chips fried & roast potatoes and potato products | HFSS food | Not UPF | Core food |
| 3992 | Cake bars, not chocolate, individual, purchased | Buns cakes pastries & fruit pies | HFSS food | UPF | Non-core food |
| 3997 | Pasta sauce, tomato based, with added vegetables | Miscellaneous | Not HFSS food | UPF | Core food |
| 4041 | Chicken pie, canned e.g. fray bentos | Meat pies and pastries | Not HFSS food | UPF | Non-core food |
| 4053 | Milk and white chocolate combination eg kinder egg, snowflake | Chocolate confectionery | HFSS food | UPF | Non-core food |
| 4082 | Soya cheese | Cheese | HFSS food | UPF | Core food |
| 4104 | Cheese and onion puffs, made with puff pastry | Pasta rice and other cereals | HFSS food | UPF | Core food |
| 4408 | Popcorn salted e.g. microwave or purchased | Crisps and savoury snacks | HFSS food | UPF | Non-core food |
| 5000 | Water not as a diluent | Tea coffee and water | Not HFSS food | Not UPF | Core food |
| 5113 | Rtd fruit flavour low cal drink | Soft drinks low calorie | Not HFSS food | UPF | Non-core food |
| 5127 | Chick breast meat only no skin grilled no + fat | Chicken and turkey dishes | Not HFSS food | Not UPF | Core food |
| 5131 | Braising steak in gravy no veg | Beef veal and dishes | Not HFSS food | UPF | Core food |
| 5134 | Rice and vegetables | Pasta rice and other cereals | Not HFSS food | Not UPF | Core food |
| 5144 | Onion gravy | Miscellaneous | Not HFSS food | UPF | Core food |
| 5166 | Supernoodles batchelors as served | Pasta rice and other cereals | HFSS food | UPF | Core food |
| 5171 | Chicken breast fried in olive oil | Chicken and turkey dishes | Not HFSS food | Not UPF | Core food |
| 5201 | Chocolate coated cake bars, individual, purchased | Buns cakes pastries & fruit pies | HFSS food | UPF | Non-core food |
| 5241 | Cauliflower cheese made with semi skimmed milk | Vegetables not raw | Not HFSS food | Not UPF | Core food |
| 5254 | Fromage frais, low fat, fruit, unfortified | Yogurt fromage frais and dairy desserts | Not HFSS food | UPF | Non-core food |
| 5263 | Chick goujons pieces in bcrumbs f/c grill/oven | Coated chicken | HFSS food | UPF | Core food |
| 5272 | Chicken drumsticks roast meat & skin (incl bone) | Chicken and turkey dishes | Not HFSS food | Not UPF | Core food |
| 5279 | Chicken casserole ready meal chicken in tomato/gravy/sauce & vegetables | Chicken and turkey dishes | Not HFSS food | UPF | Core food |
| 5284 | Chicken slices wafer thin not smoked | Chicken and turkey dishes | HFSS food | UPF | Core food |
| 5323 | Pork roast slices | Pork and dishes | HFSS food | UPF | Core food |
| 5361 | Yogurt, whole milk, with added sugar, no fruit | Yogurt fromage frais and dairy desserts | Not HFSS food | UPF | Core food |
| 5377 | Sponge cake marg lemon & glace icing | Buns cakes pastries & fruit pies | HFSS food | Not UPF | Non-core food |
| 5384 | Soups with pasta | Miscellaneous | Not HFSS food | UPF | Core food |
| 5447 | Quorn quarter pounder grilled no bun | Vegetables not raw | Not HFSS food | UPF | Core food |
| 5448 | Sponge cake with jam and glace icing, not choc, purchased | Buns cakes pastries & fruit pies | HFSS food | UPF | Non-core food |
| 5466 | Chicken meatballs in tomato sauce | Chicken and turkey dishes | Not HFSS food | Not UPF | Core food |
| 5501 | Ribena b'currant juice drink rtd not light | Soft drinks not low calorie | HFSS food | UPF | Non-core food |
| 5502 | Ribena juice drink rtd orange, not light | Soft drinks not low calorie | HFSS food | UPF | Non-core food |
| 5582 | Homemade chicken korma | Chicken and turkey dishes | Not HFSS food | Not UPF | Core food |
| 5668 | Chicken and vegetable soup | Miscellaneous | Not HFSS food | Not UPF | Core food |
| 5721 | Lentil soup with leek carrots & turnips | Miscellaneous | Not HFSS food | Not UPF | Core food |
| 5811 | Chilli con carne lean beef mince & chilli sauce | Beef veal and dishes | Not HFSS food | Not UPF | Core food |
| 5813 | Pasta sauce tomato based reduced calorie e.g dolmio | Miscellaneous | Not HFSS food | UPF | Core food |
| 5992 | Mississippi mud pie | Buns cakes pastries & fruit pies | HFSS food | Not UPF | Non-core food |
| 6036 | Pesto sauce green | Miscellaneous | HFSS food | UPF | Core food |
| 6139 | Cheese & vegetable pasta | Pasta rice and other cereals | Not HFSS food | Not UPF | Core food |
| 6168 | Pork meatballs in tomato sauce | Pork and dishes | Not HFSS food | Not UPF | Core food |
| 6282 | Plain dosa indian pancake lentils rice flour | Vegetables not raw | Not HFSS food | Not UPF | Core food |
| 6310 | Chocolate crisp biscuit bar | Biscuits | HFSS food | UPF | Non-core food |
| 6312 | Chocolate sponge pudding with chocolate sauce | Puddings | HFSS food | Not UPF | Non-core food |
| 6323 | Quorn vegetarian lasagne frozen/chilled ready meal | Vegetables not raw | Not HFSS food | UPF | Core food |
| 6597 | Muffins american, chocolate, purchased | Buns cakes pastries & fruit pies | HFSS food | UPF | Non-core food |
| 6692 | Chilli con carne minced beef kid beans & tin tom | Beef veal and dishes | Not HFSS food | Not UPF | Core food |
| 6752 | Ham and mozzarella pastry | Meat pies and pastries | HFSS food | Not UPF | Non-core food |
| 6821 | Fish curry | Other white fish shellfish & fish dishes | Not HFSS food | Not UPF | Core food |
| 6825 | Pretzels, any flavour | Crisps and savoury snacks | HFSS food | UPF | Non-core food |
| 6838 | Tortilla (wheat) soft | Other bread | Not HFSS food | UPF | Core food |
| 6846 | Mayonnaise based dips | Miscellaneous | HFSS food | UPF | Non-core food |
| 6880 | Tomato soup with cream,home-made | Miscellaneous | Not HFSS food | Not UPF | Core food |
| 6883 | Cereal bar with fruits, no nuts, not coated (uf) | Biscuits | HFSS food | UPF | Core food |
| 6959 | Robinsons fruit shoot, nas, rtd | Soft drinks low calorie | Not HFSS food | UPF | Non-core food |
| 6966 | Crumble, fruit, purchased | Puddings | HFSS food | UPF | Non-core food |
| 6972 | Ice cream,standard, dairy, (made with milk/cream) chocolate only, soft scoop | Ice cream | HFSS food | UPF | Non-core food |
| 6975 | Scotch pancakes, plain, purchased | Buns cakes pastries & fruit pies | HFSS food | UPF | Non-core food |
| 6977 | Ciabatta, plain | White bread | Not HFSS food | UPF | Non-core food |
| 6992 | Prawn crackers | Pasta rice and other cereals | HFSS food | UPF | Non-core food |
| 6994 | Sesame prawn toasts | Pasta rice and other cereals | HFSS food | UPF | Non-core food |
| 6997 | Yogurt, greek style , cows, with honey, whole milk | Yogurt fromage frais and dairy desserts | HFSS food | UPF | Core food |
| 7100 | Gluten free pasta (rice and millet) boiled | Pasta rice and other cereals | Not HFSS food | Not UPF | Core food |
| 7127 | Yogurt, soya alternative, with fruit pieces, fortified with ca, b2, b12 and vit d | Yogurt fromage frais and dairy desserts | Not HFSS food | UPF | Core food |
| 7189 | Quorn mycoprotein and pieces | Vegetables not raw | Not HFSS food | UPF | Core food |
| 7203 | Quavers | Crisps and savoury snacks | HFSS food | UPF | Non-core food |
| 7600 | Cous cous cooked | Pasta rice and other cereals | Not HFSS food | Not UPF | Core food |
| 7615 | Garlic (& herb) bread | White bread | HFSS food | UPF | Core food |
| 7621 | Brown, granary, wheatgerm rolls, soft, not fortified eg not morrisons | Brown granary and wheatgerm bread | Not HFSS food | UPF | Core food |
| 7622 | Naan bread plain | White bread | Not HFSS food | UPF | Core food |
| 7630 | Rice krispies own brand not kelloggs | Other breakfast cereals | HFSS food | UPF | Core food |
| 7637 | Nestle cheerios multigrain, not honey nut | High fibre breakfast cereals | HFSS food | UPF | Core food |
| 7649 | Bread sticks eg grissini | Biscuits | HFSS food | UPF | Non-core food |
| 7661 | Jaffa cakes | Biscuits | HFSS food | UPF | Non-core food |
| 7662 | Cookies and biscuits with chocolate | Biscuits | HFSS food | UPF | Non-core food |
| 7663 | Cookies and biscuits with chocolate and nuts | Biscuits | HFSS food | UPF | Non-core food |
| 7679 | Iced or glazed ring doughnuts | Buns cakes pastries & fruit pies | HFSS food | UPF | Non-core food |
| 7687 | Cupcakes purchased, any flavour | Buns cakes pastries & fruit pies | HFSS food | UPF | Non-core food |
| 7689 | Fairy cake, plain, iced, purchased | Buns cakes pastries & fruit pies | HFSS food | UPF | Non-core food |
| 7691 | Gingerbread / gingercake purchased | Buns cakes pastries & fruit pies | HFSS food | UPF | Non-core food |
| 7696 | Cream desserts choc/caramel not fruit containing | Yogurt fromage frais and dairy desserts | HFSS food | UPF | Non-core food |
| 7704 | Jelly low in sugar made with water | Puddings | Not HFSS food | UPF | Core food |
| 7711 | Mousse fruit flavoured | Yogurt fromage frais and dairy desserts | HFSS food | UPF | Non-core food |
| 7736 | Fromage frais, full fat , fruit | Yogurt fromage frais and dairy desserts | Not HFSS food | UPF | Non-core food |
| 7739 | Fromage frais virtually fat free, fruit, no artficial sweetner | Yogurt fromage frais and dairy desserts | Not HFSS food | UPF | Non-core food |
| 7741 | Yogurt, greek style, cows, natural, whole milk | Yogurt fromage frais and dairy desserts | HFSS food | Not UPF | Core food |
| 7755 | Yogurt drink containing fruit puree | Yogurt fromage frais and dairy desserts | Not HFSS food | UPF | Core food |
| 7758 | Ice cream reduced calorie | Ice cream | HFSS food | UPF | Non-core food |
| 7762 | Ice-lollies not with added vitamin c | Sugar confectionery | HFSS food | UPF | Non-core food |
| 7765 | Scrambled egg without milk | Eggs and egg dishes | Not HFSS food | Not UPF | Core food |
| 7775 | Reduced fat spread (41-62%) not polyunsaturated | Reduced fat spread | HFSS food | UPF | Non-core food |
| 7792 | Sausages premium pork fried | Sausages | HFSS food | UPF | Non-core food |
| 7793 | Sausages, premium pork, grilled | Sausages | HFSS food | UPF | Non-core food |
| 7796 | Pork pie buffet | Meat pies and pastries | HFSS food | UPF | Non-core food |
| 7798 | Cod baked or grilled no butter | Other white fish shellfish & fish dishes | Not HFSS food | Not UPF | Core food |
| 7855 | Lettuce-iceberg raw | Salad and other raw vegetables | Not HFSS food | Not UPF | Core food |
| 7857 | Peppers-red-fresh uncooked | Salad and other raw vegetables | Not HFSS food | Not UPF | Core food |
| 7858 | Vegetable sausage roll | Vegetables not raw | HFSS food | UPF | Core food |
| 7862 | Potato salad | Other potatoes potato salads & dishes | Not HFSS food | Not UPF | Core food |
| 7870 | Crinkle crisps fried in high oleic sunf oil eg walkers crinkles | Crisps and savoury snacks | HFSS food | UPF | Non-core food |
| 7871 | Square crisps | Crisps and savoury snacks | HFSS food | UPF | Non-core food |
| 7872 | Potato rings eg hula hoops | Crisps and savoury snacks | HFSS food | UPF | Non-core food |
| 7874 | Ringos other cereal wheatflour and potato snacks | Crisps and savoury snacks | HFSS food | UPF | Non-core food |
| 7875 | Chipsticks other potato & corn sticks | Crisps and savoury snacks | HFSS food | UPF | Non-core food |
| 7876 | Tortilla chips | Crisps and savoury snacks | HFSS food | UPF | Non-core food |
| 7878 | Wheat crunchies | Crisps and savoury snacks | HFSS food | UPF | Non-core food |
| 7885 | Yogurt coated peanuts/raisins | Sugar confectionery | HFSS food | UPF | Non-core food |
| 7925 | Cream of chicken soup carton ready to serve | Miscellaneous | Not HFSS food | UPF | Core food |
| 7985 | Fromage frais fruit flavoured with sugars & sweeteners e.g weight watchers | Yogurt fromage frais and dairy desserts | Not HFSS food | UPF | Core food |
| 7988 | Peppers red fresh boiled | Vegetables not raw | Not HFSS food | Not UPF | Core food |
| 8007 | Water icing (top of iced bun) | Sugars preserves and sweet spreads | HFSS food | UPF | Non-core food |
| 8012 | Pork and beef meatballs oven baked or grilled | Pork and dishes | HFSS food | UPF | Core food |
| 8016 | Chocolate brownie no nuts purchased | Buns cakes pastries & fruit pies | HFSS food | UPF | Non-core food |
| 8017 | Chocolate cake with filling and icing purchased only | Buns cakes pastries & fruit pies | HFSS food | UPF | Non-core food |
| 8019 | Multiseed bread wholemeal only | Wholemeal bread | Not HFSS food | UPF | Core food |
| 8020 | Multiseed bread white only | White bread | Not HFSS food | UPF | Core food |
| 8021 | Kinder; bueno, maxi, happy hippo, happy hippo cocoa cream | Chocolate confectionery | HFSS food | UPF | Non-core food |
| 8023 | Smoothies yellow bottled purchased fruit and juice blend | Fruit juice | Not HFSS food | Not UPF | Core food |
| 8024 | Smoothies red bottled purchased fruit and juice blends | Fruit juice | Not HFSS food | Not UPF | Core food |
| 8030 | French fries eg walkers | Crisps and savoury snacks | HFSS food | UPF | Non-core food |
| 8055 | Quorn in breadcrumbs inc nuggets, dippers, goujons, burgers | Vegetables not raw | Not HFSS food | UPF | Core food |
| 8057 | Caramel wafer bar covered in chocolate | Biscuits | HFSS food | UPF | Non-core food |
| 8068 | Maple syrup | Sugars preserves and sweet spreads | HFSS food | Not UPF | Non-core food |
| 8070 | Kelloggs rice krispies squares all varieties | Biscuits | HFSS food | UPF | Non-core food |
| 8075 | Vegetable crisps fried in sunflower oil | Crisps and savoury snacks | HFSS food | UPF | Non-core food |
| 8079 | Coleslaw purchased not low calorie | Salad and other raw vegetables | Not HFSS food | UPF | Core food |
| 8082 | Fruit juice fortified with multivitamins | Fruit juice | Not HFSS food | UPF | Core food |
| 8084 | Mixed leaf salad | Salad and other raw vegetables | Not HFSS food | Not UPF | Core food |
| 8105 | Fruit cake plain purchased | Buns cakes pastries & fruit pies | HFSS food | UPF | Non-core food |
| 8108 | Quorn sausage | Vegetables not raw | Not HFSS food | UPF | Core food |
| 8111 | Pain au chocolate/chocolate croissant | Buns cakes pastries & fruit pies | HFSS food | UPF | Non-core food |
| 8119 | Mashed potato with cheddar cheese purchased | Other potatoes potato salads & dishes | HFSS food | UPF | Core food |
| 8122 | Cake, not chocolate, with buttercream and/or icing, purchased | Buns cakes pastries & fruit pies | HFSS food | UPF | Non-core food |
| 8128 | Tomato and mozzarella pasta bake purchased | Pasta rice and other cereals | Not HFSS food | UPF | Core food |
| 8130 | Tuna mayonnaise homemade | Other white fish shellfish & fish dishes | Not HFSS food | Not UPF | Core food |
| 8131 | Ciabatta / panini toasted | White bread | Not HFSS food | UPF | Core food |
| 8136 | Go ahead yogurt breaks | Biscuits | HFSS food | UPF | Non-core food |
| 8152 | Ready to serve custard not canned eg ambrosia devon custard | Puddings | Not HFSS food | UPF | Core food |
| 8161 | Chocolate cake bar with chocolate chips purchased | Buns cakes pastries & fruit pies | HFSS food | UPF | Non-core food |
| 8162 | Shortbread purchased | Biscuits | HFSS food | UPF | Non-core food |
| 8176 | Croissant with sweet filling | Buns cakes pastries & fruit pies | HFSS food | UPF | Non-core food |
| 8194 | Chocolate biscuit fully coated containing wafer & cream | Biscuits | HFSS food | UPF | Non-core food |
| 8195 | Chocolate coated biscuits with marshmallow | Biscuits | HFSS food | UPF | Non-core food |
| 8197 | Crunch biscuits half coated with chocolate | Biscuits | HFSS food | UPF | Non-core food |
| 8201 | Iced biscuits | Biscuits | HFSS food | UPF | Non-core food |
| 8207 | Custard fruit desserts | Puddings | Not HFSS food | UPF | Core food |
| 8208 | Fruit cup jelly with fruit | Fruit | HFSS food | UPF | Core food |
| 8215 | Milkshake purchased made with semi-skimmed milk | Other milk and cream | Not HFSS food | UPF | Core food |
| 8250 | Chicken breast coated egg & crumbs purchased fried in blended veg oil | Coated chicken | HFSS food | UPF | Core food |
| 8253 | Chicken breast coated purchased fried in p/s oil no bones | Coated chicken | HFSS food | UPF | Core food |
| 8264 | Beefburger 100% grilled | Burgers and kebabs | HFSS food | UPF | Non-core food |
| 8267 | Pepperami | Other meat and meat products | HFSS food | UPF | Non-core food |
| 8288 | Vegetable fingers breadcrumbs grilled | Vegetables not raw | Not HFSS food | UPF | Core food |
| 8294 | Potatoes new boiled without skins | Other potatoes potato salads & dishes | Not HFSS food | Not UPF | Core food |
| 8358 | Pasta sauce tomato based | Miscellaneous | Not HFSS food | UPF | Non-core food |
| 8365 | Yorkshire pudding frozen | Pasta rice and other cereals | HFSS food | UPF | Core food |
| 8394 | Gluten free white bread with added fibre | Other bread | Not HFSS food | UPF | Core food |
| 8420 | Soya custard with added calcium | Other milk and cream | Not HFSS food | UPF | Core food |
| 8442 | Kelloggs nutrigrain oat baked bars | Biscuits | HFSS food | UPF | Non-core food |
| 8466 | Cous cous with additions cooked | Pasta rice and other cereals | Not HFSS food | Not UPF | Core food |
| 8507 | Swiss roll with jam and cream filling | Buns cakes pastries & fruit pies | HFSS food | Not UPF | Non-core food |
| 8562 | Chocolate swiss roll with buttercream purchased | Buns cakes pastries & fruit pies | HFSS food | UPF | Non-core food |
| 8565 | Quiche, meat based, purchased, eg. Quiche lorraine not low fat | Eggs and egg dishes | HFSS food | UPF | Core food |
| 8574 | Pizza base with losses | Pasta rice and other cereals | Not HFSS food | UPF | Core food |
| 8583 | Tomato sauce with onions | Miscellaneous | Not HFSS food | UPF | Core food |
| 8589 | Vegetable shepherds pie | Vegetables not raw | Not HFSS food | Not UPF | Core food |
| 8590 | Vegetable casserole | Vegetables not raw | Not HFSS food | Not UPF | Core food |
| 8600 | Sponge cake with fat no filling no icing purchased | Buns cakes pastries & fruit pies | HFSS food | UPF | Non-core food |
| 8604 | Mango juice fresh | Fruit juice | Not HFSS food | Not UPF | Core food |
| 8627 | Pancakes made with semi skimmed milk | Puddings | HFSS food | Not UPF | Core food |
| 8661 | Chocolate dairy desserts chilled eg.cadbury | Yogurt fromage frais and dairy desserts | HFSS food | UPF | Non-core food |
| 8681 | Vegetable risotto | Vegetables not raw | Not HFSS food | Not UPF | Core food |
| 8694 | Turkey and pork luncheon meat eg. Sainsburys billy bear | Other meat and meat products | HFSS food | UPF | Non-core food |
| 8704 | Apple bakewell tart | Buns cakes pastries & fruit pies | HFSS food | Not UPF | Non-core food |
| 8713 | Chocolate cake pufa marg homemade no filling/icing | Buns cakes pastries & fruit pies | HFSS food | Not UPF | Non-core food |
| 8779 | Cheese & onion quiche homemade | Eggs and egg dishes | HFSS food | Not UPF | Core food |
| 8864 | Gluten free white bread not low protein | Other bread | Not HFSS food | UPF | Core food |
| 8890 | Minestrone soup homemade | Miscellaneous | Not HFSS food | Not UPF | Core food |
| 8912 | Bolognaise sauce lean mince - basic recipe | Beef veal and dishes | Not HFSS food | Not UPF | Core food |
| 8968 | Lollipops (not ice lollies) fortified vitamin c | Sugar confectionery | HFSS food | UPF | Non-core food |
| 9098 | Spaghetti caebrbonara | Pasta rice and other cereals | Not HFSS food | Not UPF | Core food |
| 9115 | Yogurt, soya alternative, smooth fruit, fortified with ca, b2, b12, vit d and vit c | Yogurt fromage frais and dairy desserts | Not HFSS food | UPF | Core food |
| 9129 | Brioche | White bread | HFSS food | UPF | Core food |
| 9141 | Fruit filled strudels, purchased | Buns cakes pastries & fruit pies | HFSS food | UPF | Non-core food |
| 9142 | Yogurt, greek style, cows, with fruit, whole milk | Yogurt fromage frais and dairy desserts | HFSS food | UPF | Core food |
| 9166 | Vegetable soup (homemade) | Miscellaneous | Not HFSS food | Not UPF | Core food |
| 9245 | Spaghetti bolognaise ready meal | Beef veal and dishes | Not HFSS food | UPF | Core food |
| 9287 | Chicken breast coated grilled | Coated chicken | Not HFSS food | UPF | Core food |
| 9373 | Bagels plain only | White bread | HFSS food | UPF | Core food |
| 9382 | Ham no added water not smoked | Bacon and ham | HFSS food | UPF | Non-core food |
| 9388 | Gherkins pickled | Vegetables not raw | Not HFSS food | Not UPF | Core food |
| 9395 | Garlic puree | Miscellaneous | HFSS food | Not UPF | Non-core food |
| 9451 | Pork loin joint roasted lean only | Pork and dishes | Not HFSS food | Not UPF | Core food |
| 9461 | Minced pork stewed lean + fat | Pork and dishes | Not HFSS food | Not UPF | Core food |
| 9468 | Plantain fried in blended veg oil | Vegetables not raw | Not HFSS food | Not UPF | Core food |
| 9508 | Ham unspecified not smoked not canned | Bacon and ham | HFSS food | UPF | Non-core food |
| 9572 | Vegetarian sausages, oven-baked/ grilled (vegetable protein) | Vegetables not raw | HFSS food | UPF | Core food |
| 9717 | Apple pie with purchased shortcrust pastry | Buns cakes pastries & fruit pies | HFSS food | UPF | Non-core food |
| 9731 | Chicken curry homemade | Chicken and turkey dishes | Not HFSS food | Not UPF | Core food |
| 9738 | Leek and potato soup | Miscellaneous | Not HFSS food | Not UPF | Core food |
| 9768 | Coconut cake homemade | Buns cakes pastries & fruit pies | HFSS food | Not UPF | Non-core food |
| 9770 | Oatmeal cookies and biscuits | Biscuits | HFSS food | UPF | Non-core food |
| 9803 | Apple cake made with butter | Buns cakes pastries & fruit pies | HFSS food | Not UPF | Non-core food |
| 9861 | Cheese & tomato quiche | Eggs and egg dishes | Not HFSS food | Not UPF | Core food |
| 9881 | Yogurt, full fat, twinpot with cereal/crumble | Yogurt fromage frais and dairy desserts | HFSS food | UPF | Core food |
| 10000 | Potato crisps, fried in veg oil not walkers not premium crisps not fried in sunflower oil. | Crisps and savoury snacks | HFSS food | UPF | Non-core food |
| 10001 | Potato crisps high oleic sunflower oil eg walkers | Crisps and savoury snacks | HFSS food | UPF | Non-core food |
| 10002 | Potato crisps, premium, fried in vegetable oil, eg pringles gourmet | Crisps and savoury snacks | HFSS food | UPF | Non-core food |
| 10003 | Baked potato crisps in sunflower oil eg walkers | Crisps and savoury snacks | HFSS food | UPF | Non-core food |
| 10004 | Potato crisps fried in sunflower oil inc premium not walkers | Crisps and savoury snacks | HFSS food | UPF | Non-core food |
| 10019 | Ready cooked savoury rice (products containing pre-cooked rice) reheated | Pasta rice and other cereals | HFSS food | UPF | Core food |
| 10026 | Cheese and tomato pizza, any base, retail | Pasta rice and other cereals | HFSS food | UPF | Non-core food |
| 10034 | Pizza with meat topping, with or without veg/fruit e.g. pepperoni. With a stuffed crust base. Retail | Pasta rice and other cereals | HFSS food | UPF | Non-core food |
| 10040 | Fat spread (62-72% fat) not polyunsaturated | Reduced fat spread | HFSS food | UPF | Non-core food |
| 10044 | Reduced fat spread (41-62% fat) polyunsaturated, fortified with b6, b12, folic acid | Reduced fat spread | HFSS food | UPF | Non-core food |
| 10045 | Vitalite only | Reduced fat spread | HFSS food | UPF | Non-core food |
| 10055 | Cheese straws/twists/crispies purchased | Biscuits | HFSS food | UPF | Non-core food |
| 10056 | Rice cakes with added sugar and chocolate | Biscuits | HFSS food | UPF | Non-core food |
| 10060 | Cereal bars with fruit and nuts, coated, unfortified | Biscuits | HFSS food | UPF | Non-core food |
| 10061 | Cookies and biscuits, not chocolate, not nut, not specified elsewhere | Biscuits | HFSS food | UPF | Non-core food |
| 10062 | Savoury crackers, not cream, not water biscuits, not wholemeal | Biscuits | HFSS food | UPF | Non-core food |
| 10070 | Tortilla chips in sunseed or high oleic sunflower oil, eg doritos | Crisps and savoury snacks | HFSS food | UPF | Non-core food |
| 10071 | Bacon flavour maize / rice flour corn snacks | Crisps and savoury snacks | HFSS food | UPF | Non-core food |
| 10072 | Prawn cocktail snacks, maize / rice flour corn snacks, eg skips | Crisps and savoury snacks | HFSS food | UPF | Non-core food |
| 10155 | Chorizo | Sausages | HFSS food | UPF | Non-core food |
| 10157 | Jelly made up with water with added vitamin c | Puddings | Not HFSS food | UPF | Core food |
| 10159 | Oat based milk alternative fortified | Other milk and cream | Not HFSS food | UPF | Core food |
| 10168 | Fruit puree in pouches nas not blackcurrant | Fruit | Not HFSS food | Not UPF | Core food |
| 10184 | Organix flavoured baby rice cakes | Commercial toddlers foods and drinks | Not HFSS food | Not UPF | Core food |
| 10198 | Jelly, containing fruit juice, purchased | Puddings | Not HFSS food | UPF | Non-core food |
| 10207 | Organix fruit cereal bars not carrot not chocolate | Biscuits | HFSS food | Not UPF | Non-core food |
| 10218 | Petit filous fromage frais | Yogurt fromage frais and dairy desserts | Not HFSS food | UPF | Non-core food |
| 10232 | Nik naks any flavour | Crisps and savoury snacks | HFSS food | UPF | Non-core food |
| 10239 | Quorn cottage pie, purchased | Vegetables not raw | Not HFSS food | UPF | Core food |
| 10262 | Childrens yogurts with added vit d | Yogurt fromage frais and dairy desserts | Not HFSS food | UPF | Core food |
| 10273 | Chocolate chip brioche rolls purchased | Buns cakes pastries & fruit pies | HFSS food | UPF | Non-core food |
| 10276 | Childrens fromage frais fruit with added vit d | Yogurt fromage frais and dairy desserts | Not HFSS food | UPF | Non-core food |
| 10282 | Italian risotto arborio rice cooked | Pasta rice and other cereals | Not HFSS food | Not UPF | Core food |
| 10311 | Tomato and cheese based pasta sauces purchased | Miscellaneous | HFSS food | UPF | Core food |
| 10385 | Heinz apple biscotti stage 2 fortified | Commercial toddlers foods and drinks | HFSS food | Not UPF | Core food |
| 10396 | Nestle chocolate dairy desserts | Yogurt fromage frais and dairy desserts | HFSS food | UPF | Non-core food |
| 10413 | Cheese spreads, triangles, plain, dairylea only | Cheese | HFSS food | UPF | Core food |
| 10466 | Actimel probiotic drinking yogurt | Yogurt fromage frais and dairy desserts | Not HFSS food | UPF | Core food |
| 10499 | Orange juice drink nas with vit c and calcium | Soft drinks low calorie | Not HFSS food | UPF | Non-core food |
| 10500 | Cheese spreads triangles plain, fortifed with calcium, not dairylea, not low cost range eg value | Cheese | HFSS food | UPF | Core food |
| 10504 | Processed cheese spread low fat, dairylea only | Cheese | HFSS food | UPF | Core food |
| 10516 | American style chocolate chip cookies | Biscuits | HFSS food | UPF | Non-core food |
| 10517 | Toasted minibreads purchased | Biscuits | HFSS food | UPF | Non-core food |
| 10536 | Weetabix oaty bars | Biscuits | Not HFSS food | UPF | Non-core food |
| 10540 | Penguin chocolate biscuit bars with calcium carbonate | Biscuits | HFSS food | UPF | Non-core food |
| 10548 | Rocky road/tiffin | Buns cakes pastries & fruit pies | HFSS food | UPF | Non-core food |
| 10561 | Potato chips, oven ready, baked, not battered | Chips fried & roast potatoes and potato products | Not HFSS food | UPF | Core food |
| 10563 | Corn based snacks eg monster munch, wotsits, transform-a-snack | Crisps and savoury snacks | HFSS food | UPF | Non-core food |
| 10575 | Alpro plain soya yogurt fortified | Yogurt fromage frais and dairy desserts | Not HFSS food | UPF | Core food |
| 10584 | Belvita breakfast biscuits fortified | Biscuits | HFSS food | UPF | Non-core food |
| 10604 | Stock cubes for infants and toddlers | Commercial toddlers foods and drinks | HFSS food | UPF | Core food |
| 10665 | Heinz chocolate biscotti stage 2 fortified | Commercial toddlers foods and drinks | HFSS food | Not UPF | Core food |
| 10697 | Apple puree, homemade, 100% stewed dessert apples nas | Fruit | Not HFSS food | Not UPF | Core food |
| 10712 | Yorkshire pudding purchased chilled or frozen, baked | Pasta rice and other cereals | Not HFSS food | UPF | Core food |
| 10731 | Carrot and coriander soup canned | Miscellaneous | Not HFSS food | UPF | Core food |
| 10754 | Wholemeal wheat tortilla wraps | Wholemeal bread | HFSS food | UPF | Core food |
| 10775 | Bread, 50% white and 50% wholemeal flours | Brown granary and wheatgerm bread | Not HFSS food | UPF | Core food |
| 10789 | Peas-chick, no added salt or sugar, canned and drained, cooked | Vegetables not raw | Not HFSS food | Not UPF | Core food |
| 10791 | Haricot beans, no added salt, canned and drained, cooked | Vegetables not raw | Not HFSS food | Not UPF | Core food |
| 10794 | Sweetcorn, canned, drained, added sugar and/or salt | Vegetables not raw | Not HFSS food | Not UPF | Core food |
| 10795 | Sweetcorn, canned, drained, non added sugar or salt | Vegetables not raw | Not HFSS food | Not UPF | Core food |
| 10964 | Banana dried no added fat or sugar | Fruit | HFSS food | Not UPF | Core food |
| 10980 | Pure soya soft and creamy dairy free spread | Cheese | HFSS food | UPF | Core food |
| 11007 | Fish fingers, salmon, grilled/baked (not cod, not pollack) | Oily fish | Not HFSS food | UPF | Core food |
| 11013 | Chew sweets no added vit c (eg chewitts, blackjacks) | Sugar confectionery | HFSS food | UPF | Non-core food |
| 11101 | Spinach raw baby spinach only | Salad and other raw vegetables | Not HFSS food | Not UPF | Core food |
| 11102 | Peppers yellow fresh raw | Salad and other raw vegetables | Not HFSS food | Not UPF | Core food |
| 11103 | Tomatoes standard raw not cherry tomatoes | Salad and other raw vegetables | Not HFSS food | Not UPF | Core food |
| 11104 | Tomatoes cherry raw not standard tomatoes | Salad and other raw vegetables | Not HFSS food | Not UPF | Core food |
| 11111 | Carrots, old, boiled | Vegetables not raw | Not HFSS food | Not UPF | Core food |
| 11112 | Carrots old fresh microwaved/steamed | Vegetables not raw | Not HFSS food | Not UPF | Core food |
| 11115 | Blueberries raw | Fruit | Not HFSS food | Not UPF | Core food |
| 11116 | Beans green raw | Salad and other raw vegetables | Not HFSS food | Not UPF | Core food |
| 11117 | Potatoes old oven baked flesh and skin | Other potatoes potato salads & dishes | Not HFSS food | Not UPF | Core food |
| 11123 | Potatoes, old, wedges with skin, homemade, oven baked with blended vegetable oil | Other potatoes potato salads & dishes | Not HFSS food | Not UPF | Core food |
| 11129 | Kerry foods cheestrings | Cheese | HFSS food | UPF | Core food |
| 11145 | Yogurt, soya alternative, fruit, fortified with calcium only | Yogurt fromage frais and dairy desserts | Not HFSS food | UPF | Core food |
| 11147 | Yogurt virtually fat free, fruit, strained without cream | Yogurt fromage frais and dairy desserts | Not HFSS food | UPF | Core food |
| 11181 | Kefir | Yogurt fromage frais and dairy desserts | Not HFSS food | Not UPF | Core food |
| 11201 | Flora original | Reduced fat spread | HFSS food | UPF | Non-core food |
| 11208 | Yogurt virtually fat free fruit with sweeteners fortified | Yogurt fromage frais and dairy desserts | Not HFSS food | UPF | Core food |
| 11254 | Yogurt drink fortified with vitamins b6, c and d | Yogurt fromage frais and dairy desserts | Not HFSS food | UPF | Core food |
| 11269 | Bear yoyo strawberry, raspberry, blackcurrant varieties | Sugar confectionery | Not HFSS food | UPF | Non-core food |
| 11282 | Bread sandwich wholemeal thins kingsmill | Wholemeal bread | Not HFSS food | UPF | Core food |
| 11311 | Yoplait childrens fromage frais/yogurts with added vitamin d eg yoplait frubes and wildlife choobs | Yogurt fromage frais and dairy desserts | Not HFSS food | UPF | Non-core food |
| 11312 | Childrens yogurts with added vitamin d - petit filous only | Yogurt fromage frais and dairy desserts | Not HFSS food | UPF | Non-core food |
| 11313 | Fromage frais added vitamin d e.g yoplait wildlife and peppa pig fromage frais | Yogurt fromage frais and dairy desserts | Not HFSS food | UPF | Non-core food |
| 11316 | Tunnocks chocolate caramel wafers | Biscuits | HFSS food | UPF | Non-core food |
| 11318 | Cadbury animal biscuits | Biscuits | HFSS food | UPF | Non-core food |
| 11319 | Mixed fruit juice drink, rtd,75% juice nas eg robinson's my-5 & capri sun fruit crush | Soft drinks low calorie | Not HFSS food | UPF | Non-core food |
| 11345 | Carrots old, fresh, boiled pureed | Vegetables not raw | Not HFSS food | Not UPF | Core food |
| 11350 | Dairylea cheese lunchables stackers | Cheese | HFSS food | UPF | Core food |
| 11351 | Dairylea dunkers cheese jumbo tubes | Cheese | HFSS food | UPF | Core food |
| 11400 | Babybel original | Cheese | HFSS food | Not UPF | Core food |
| 11416 | Cadbury milk chocolate fingers only | Biscuits | HFSS food | UPF | Non-core food |
| 11419 | Oreo and supermarket versions only, all flavours | Biscuits | HFSS food | UPF | Non-core food |
| 30025 | Swede boiled (pureed) | Vegetables not raw | Not HFSS food | Not UPF | Core food |

1. National Diet and Nutrition Survey Rolling programme Years 9 to 11 (2016/2017 to 2018/2019). (2020). [↑](#footnote-ref-1)
2. Center PBR. Accessed 17/07/2025, 2025. http://www.pbrc.edu/ [↑](#footnote-ref-2)
